# Supplementary material for: Recent Overview of Potent Antioxidant Activity of Coordination Compounds
Source: MDPI journal article supplement (doi:10.3390/antiox12020213), 2023-01-17
Supplement: s1 [file s1]

## Recent overview on potent antioxidant activity of coordination compounds

Hany M. Abd El-Lateef<sup>1,2,\*</sup>, Tarek El-Dabea<sup>2,3</sup>, Mai M. Khalaf<sup>1,2</sup> and Ahmed M. Abu-Dief<sup>2,4,\*</sup>

<sup>1</sup>Department of Chemistry, College of Science, King Faisal University, P.O. Box 400 Al-Ahsa 31982,

Saudi Arabia; [hmahmed@kfu.edu.sa](mailto:hmahmed@kfu.edu.sa)(H.M.A.); [mmkali@kfu.edu.sa](mailto:mmkali@kfu.edu.sa) (M.M.K.)

<sup>2</sup>Chemistry Department, Faculty of Science, Sohag University, Sohag-82534, Egypt; (T.E.D.) [tarekeldabea@gmail.com](mailto:tarekeldabea@gmail.com)

<sup>3</sup> King Salman International University, Faculty of Science, Ras Sudr, Sinai, 46612 Egypt, [tarek.eldabea@Ksiu.edu.eg](mailto:tarek.eldabea@Ksiu.edu.eg)

<sup>4</sup>Chemistry Department, College of Science, Taibah University, Madinah, P.O. Box 344, Saudi Arabia; [amamohammed@taibahu.edu.sa](mailto:amamohammed@taibahu.edu.sa) (A. M. Abu-Dief)

\* Correspondence: authors: [hmahmed@kfu.edu.sa](mailto:hmahmed@kfu.edu.sa); [hany\\_shubra@science.sohag.edu.eg](mailto:hany_shubra@science.sohag.edu.eg) (H. M. Abd El-Lateef), [amamohammed@taibahu.edu.sa](mailto:amamohammed@taibahu.edu.sa) ; [ahmedabudief@science.sohag.edu.eg](mailto:ahmedabudief@science.sohag.edu.eg) (A. M. Abu-Dief).

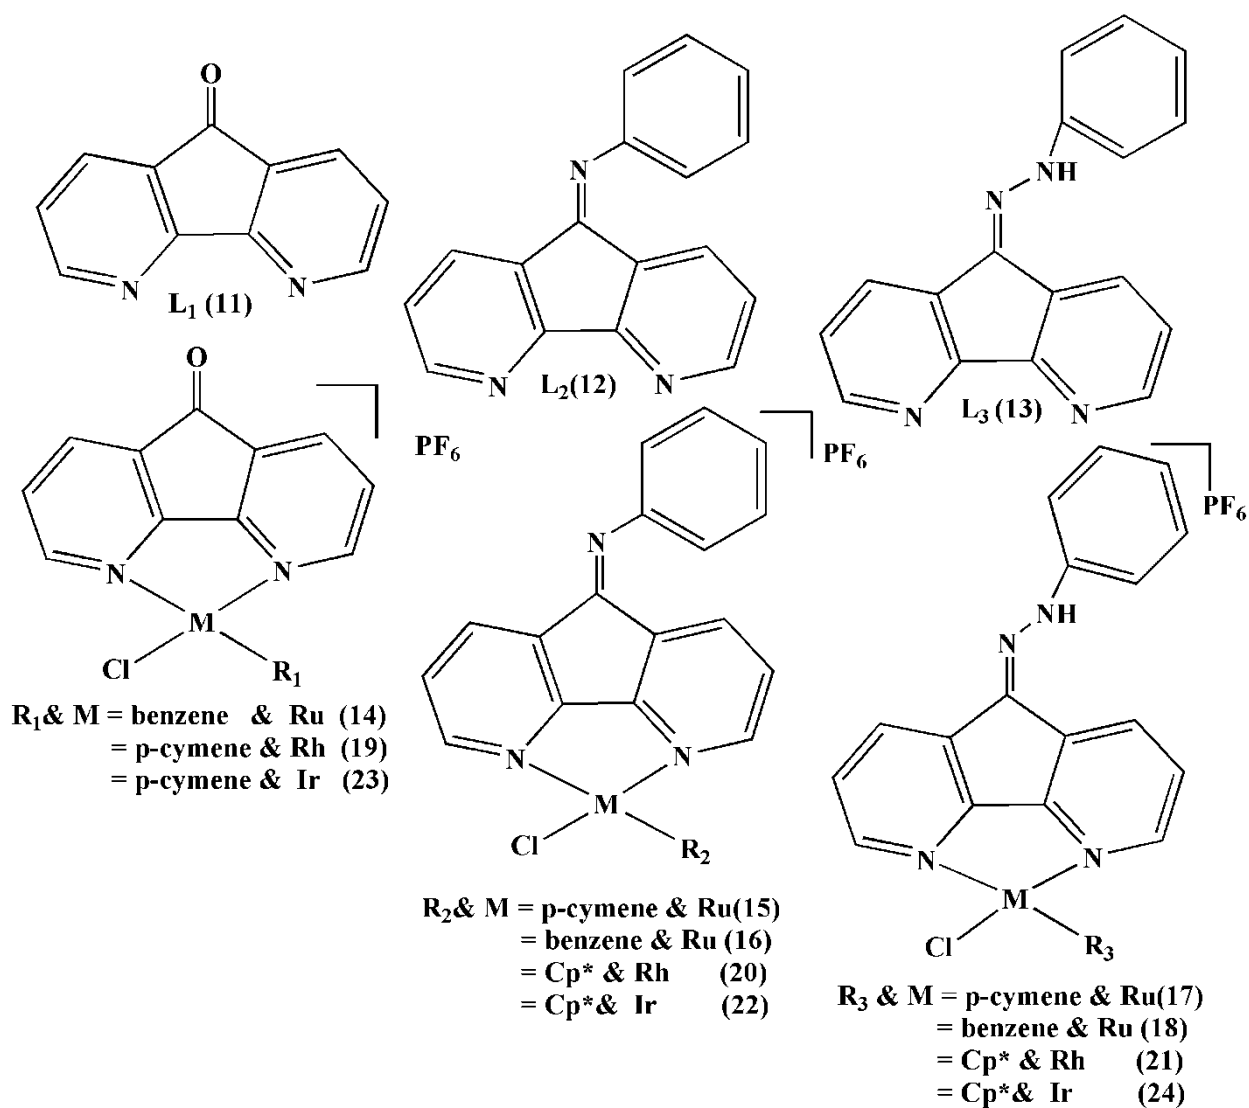

**Scheme S1.** The structures of Schiff base ligand and their metal complexes [141].

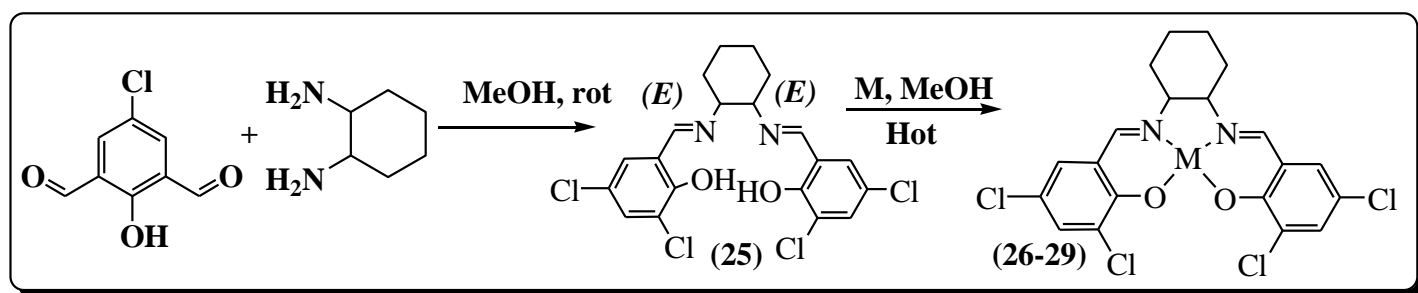

**Scheme S2.** The proposed reaction pathway for formation of the metal complex with the ligand [142].

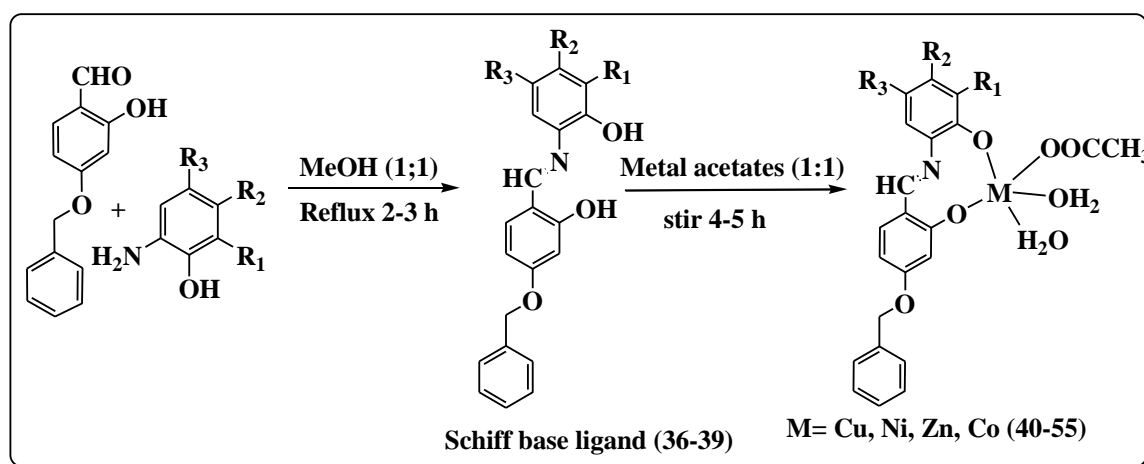

| Ligands   | BHAP                          | BHACM           | BHACN           | BHIMP |
|-----------|-------------------------------|-----------------|-----------------|-------|
| <b>R1</b> | H                             | Cl              | Cl              | H     |
| <b>R2</b> | C <sub>6</sub> H <sub>5</sub> | CH <sub>3</sub> | H               | H     |
| <b>R3</b> | H                             | Cl              | NO <sub>2</sub> | H     |

**Scheme S3.** For synthesis of Schiff base ligands (36-39) and their Co(II), Ni(II), Cu(II) and Zn(II) complexes (40-55) [145].

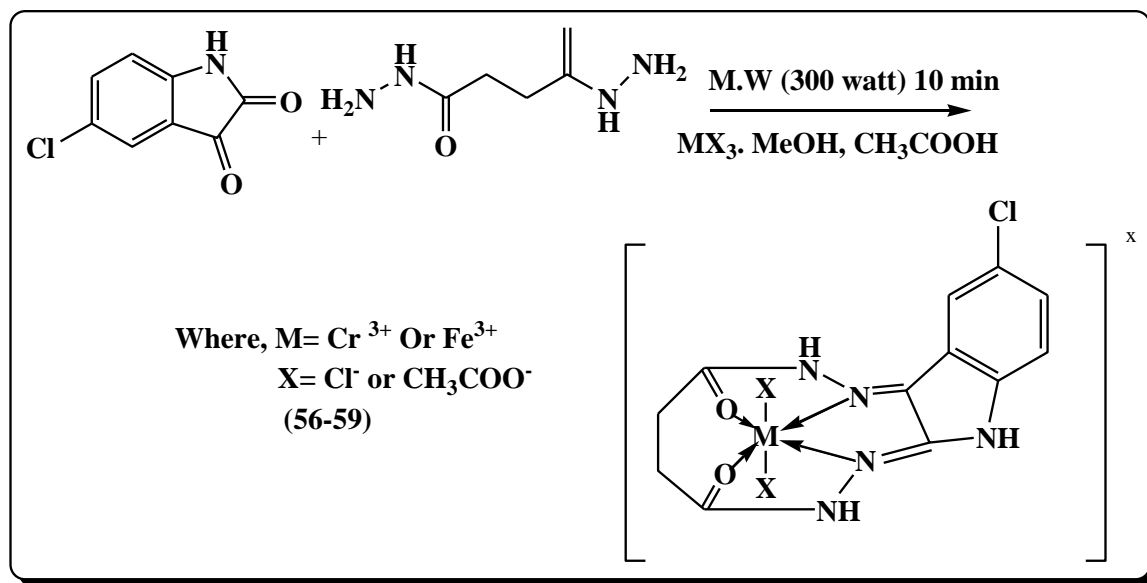

**Scheme S4.** Synthesis of the investigated heterocyclic metal complexes (56-59)[146].

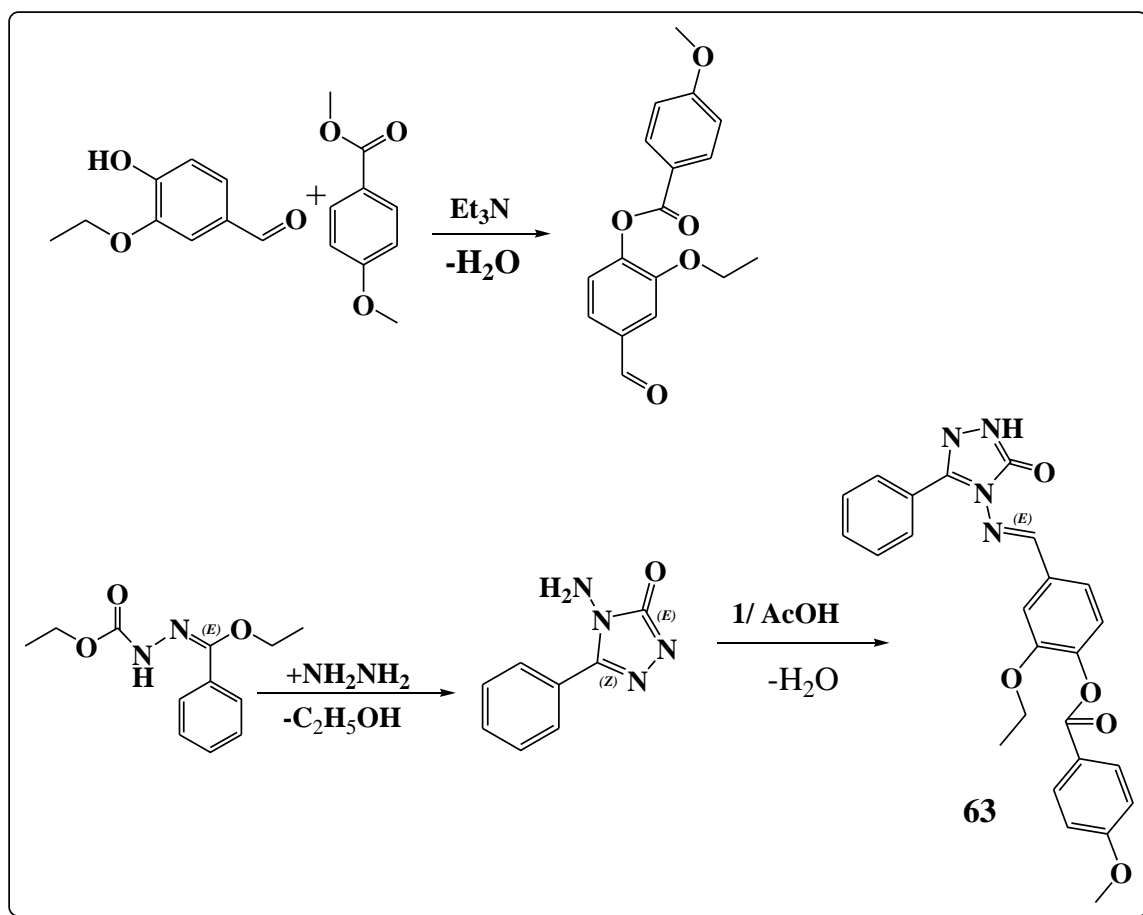

**Scheme S5.** Syntheses route of compound 63. [147]

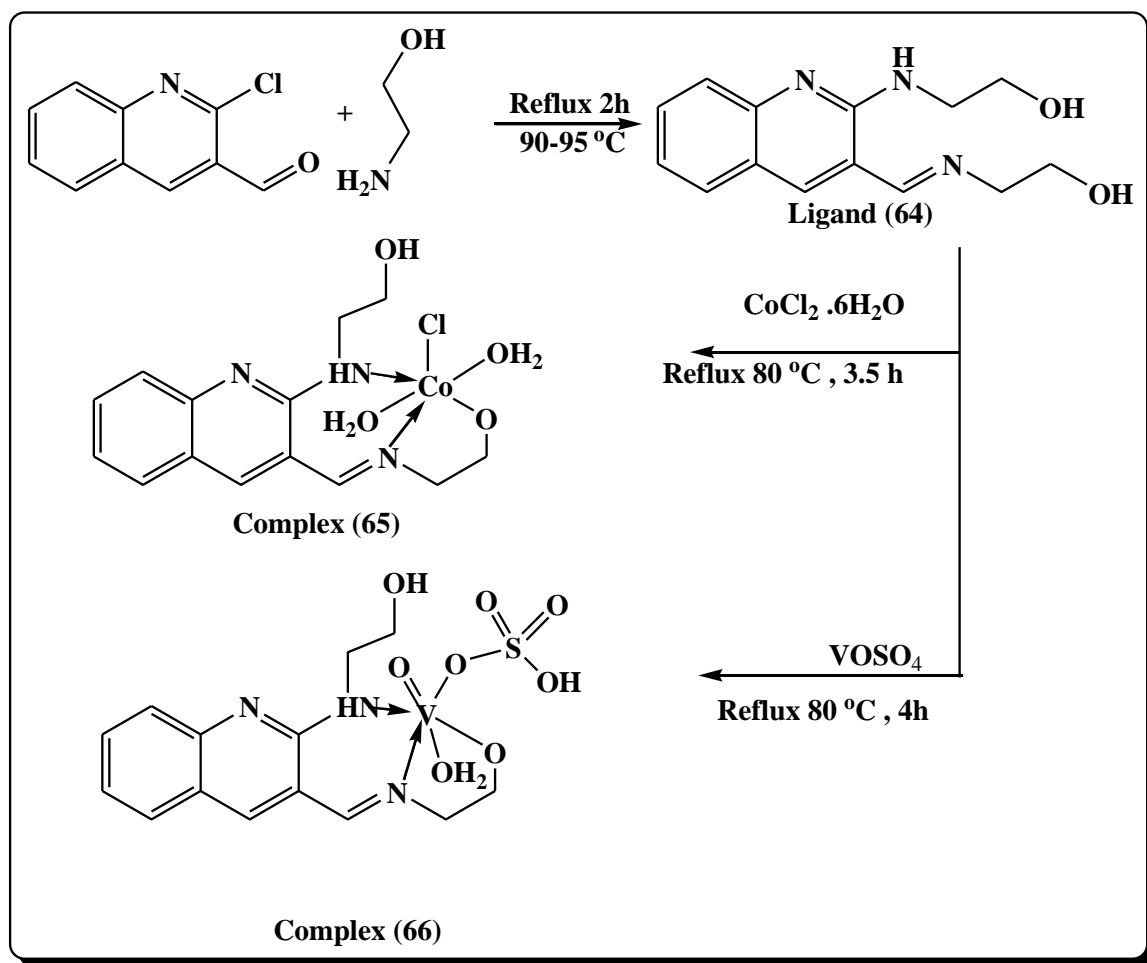

**Scheme S6.** Synthesis Reaction Steps of the (a) Ligand (64) and (b) Co(II) (65) and V(IV) (66) Complexes of (*E*)-2-(((2-((2-Hydroxyethyl)amino)quinolin-3-yl)methylene)amino)ethan-1-ol [149].

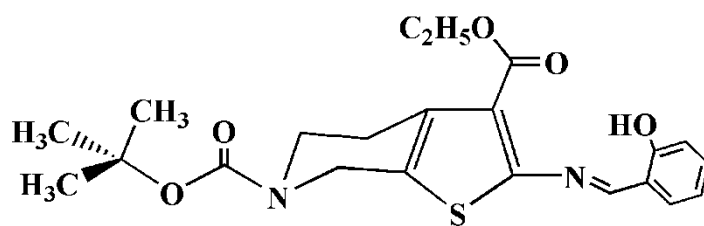

**TBHPC (87)**

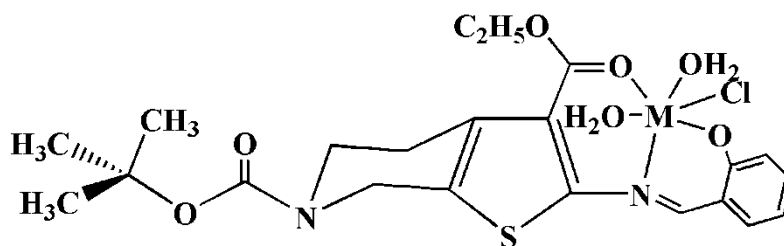

**M= Fe (II), Co(II) and Ni(II) (88-90)**

**Scheme S7 :** Suggested structures of the ligand and its Fe(II), Co(II), and Ni(II) metal complexes

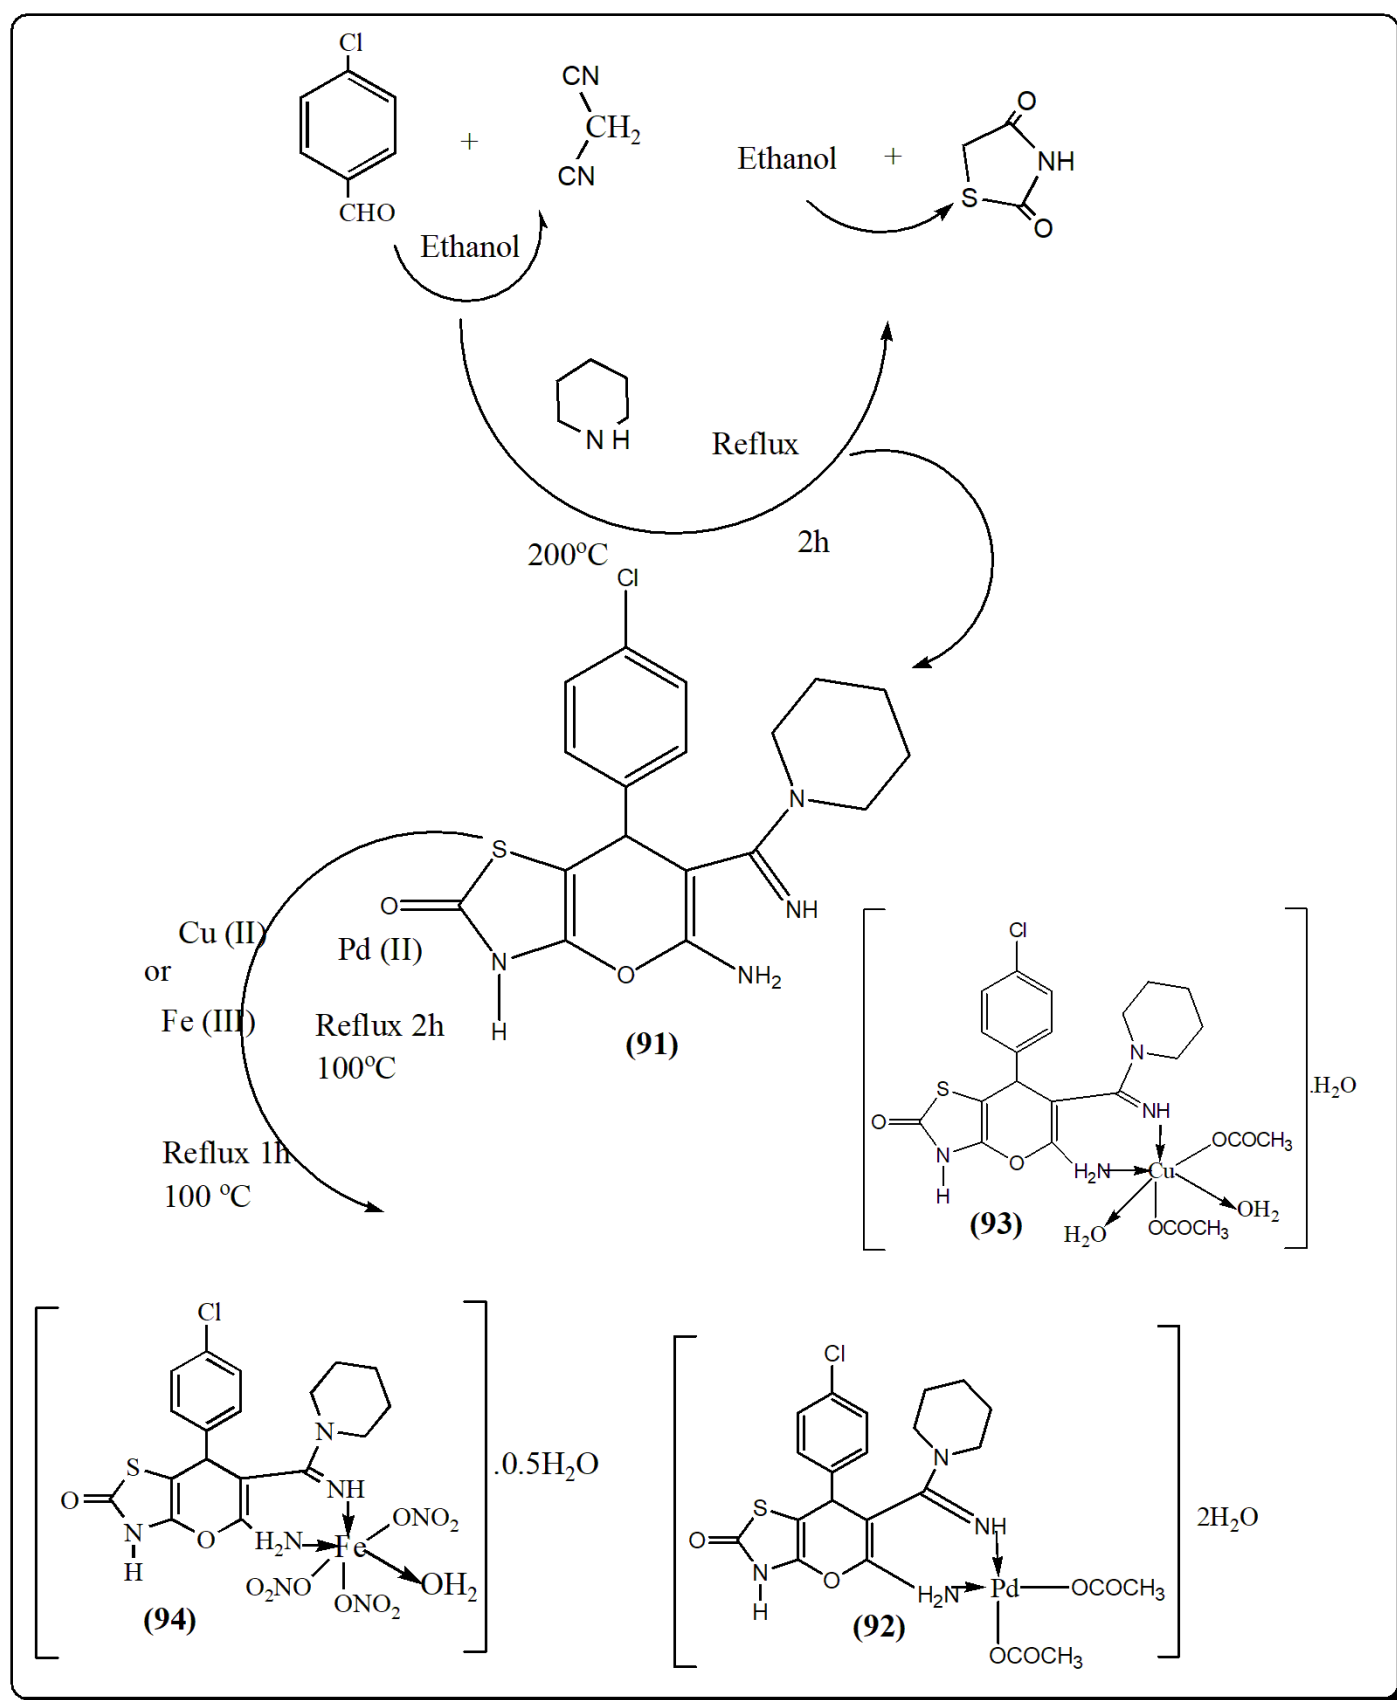

**Scheme S8:** Synthesis strategy of the ligand (**91**) and its complexes (**92-94**) [155]

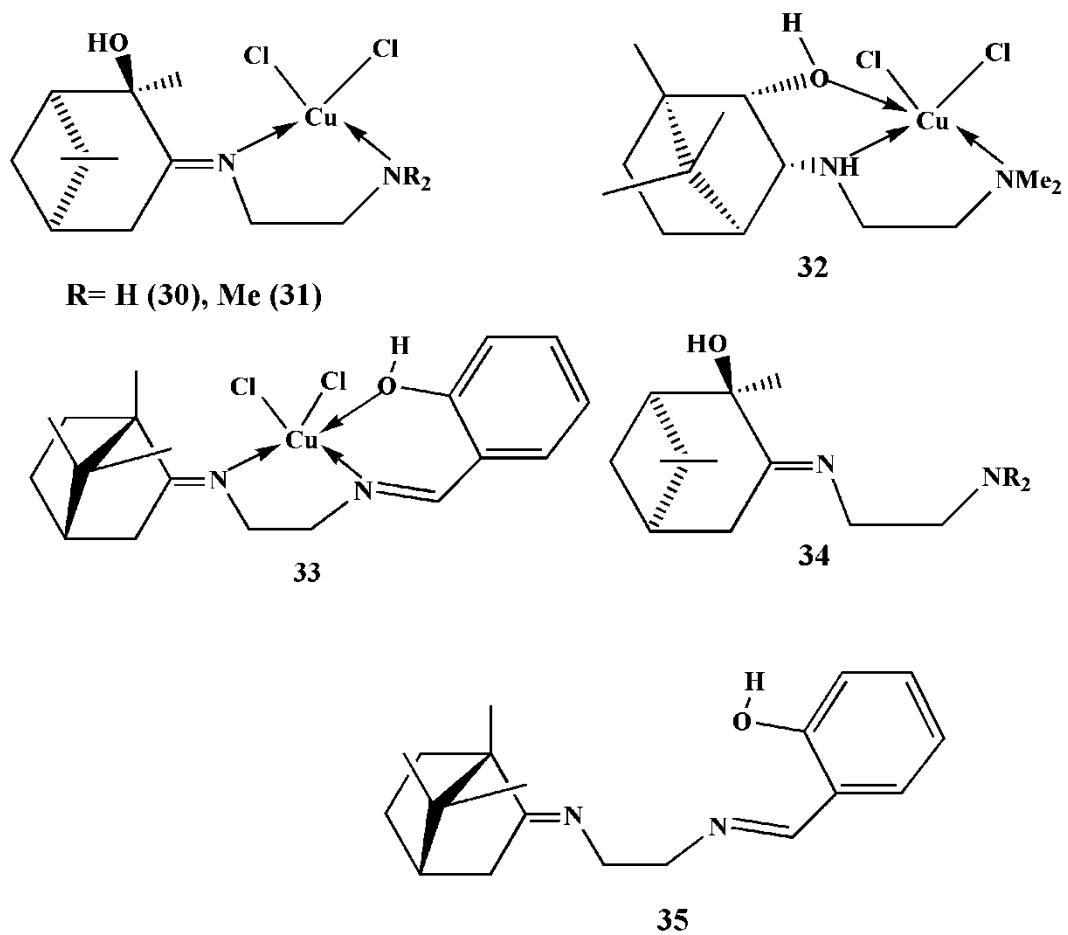

**Fig. S1:** New copper complexes (30-33) with terpene derivatives of ethylenediamine (34- 35) [144].



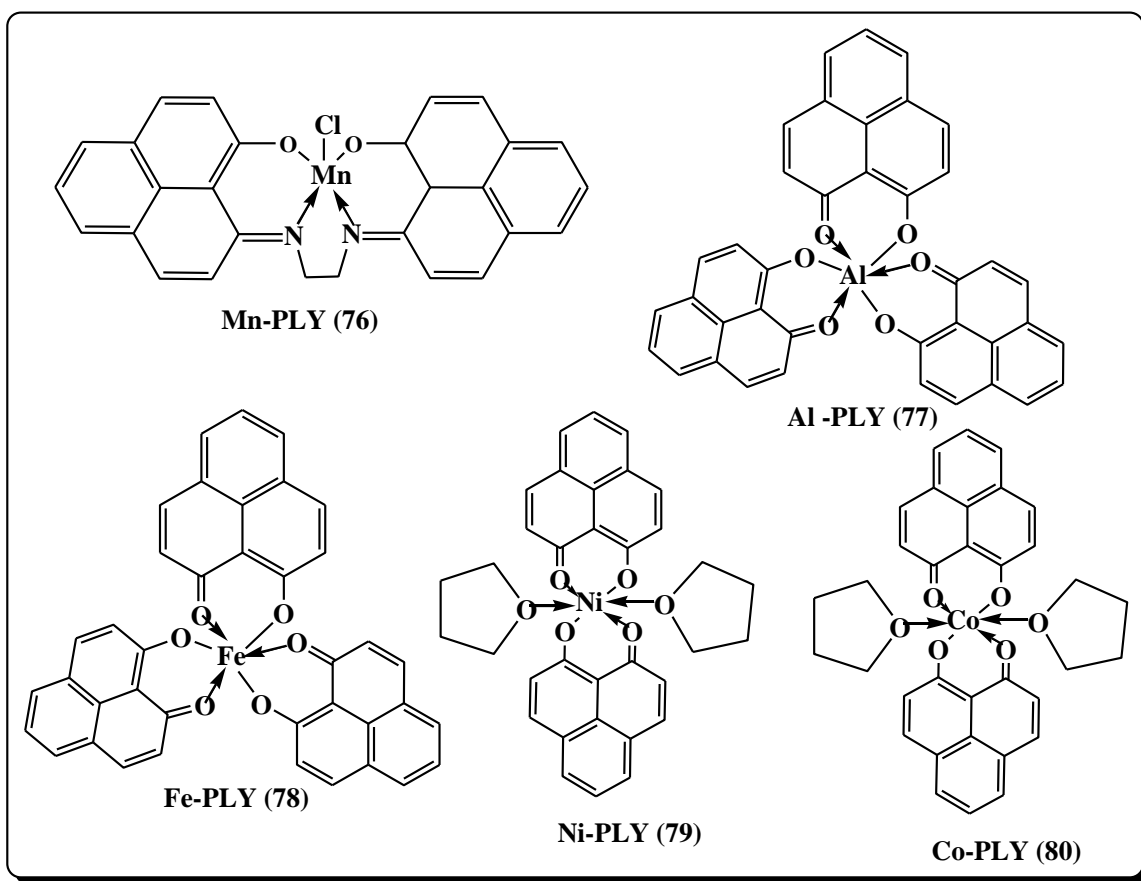

**Fig. S2:** Structures of the metal-PLY complexes [151].
